# Supplementary material for: Proof-of-concept optimization of a copper-mediated 18F-radiosynthesis of a novel MAGL PET tracer on a high-throughput microdroplet platform and its macroscale translation
Source: Royal Society of Chemistry journal article supplement (doi:10.1039/d3lc00735a), 2023-01-01
Supplement: d3lc00735a1.pdf [file d3lc00735a1.pdf]

# Supplemental Information

Proof-of-concept optimization of a copper-mediated  $^{18}\text{F}$ -radiosynthesis of a novel MAGL PET tracer on a high-throughput microdroplet platform and its macroscale translation

Yingqing Lu<sup>abc</sup>, Yingfang He<sup>d</sup>, Roger Schibli<sup>d</sup>, Linjing Mu<sup>d</sup>, R. Michael van Dam<sup>\*abc</sup>

<sup>a</sup>Crump Institute for Molecular Imaging, University of California Los Angeles (UCLA), Los Angeles, CA, USA

<sup>b</sup>Department of Molecular & Medical Pharmacology, UCLA, Los Angeles, CA, USA

<sup>c</sup>Physics and Biology in Medicine Interdepartmental Graduate Program, UCLA, Los Angeles, CA, USA

<sup>d</sup>Center for Radiopharmaceutical Sciences, Institute of Pharmaceutical Sciences, Department of Chemistry and Applied Biosciences, ETH Zurich, Zurich, Switzerland

## Contents

|     |                                                                              |    |
|-----|------------------------------------------------------------------------------|----|
| 1   | Optimization of [ $^{18}\text{F}$ ]YH149 synthesis on droplet reactors ..... | 2  |
| 1.1 | Initial conditions.....                                                      | 2  |
| 1.2 | Influence of solvent type .....                                              | 3  |
| 1.3 | Influence of type of phase transfer catalyst (PTC)/base.....                 | 3  |
| 1.4 | Impact of fluorination temperature and base type.....                        | 4  |
| 1.5 | Impact of reaction time .....                                                | 5  |
| 1.6 | Influence of amount of base .....                                            | 6  |
| 1.7 | Influence of amount of precursor.....                                        | 7  |
| 2   | Macroscale synthesis performance .....                                       | 8  |
| 3   | Calibration curve to determine molar activity.....                           | 10 |
| 4   | Example HPLC chromatograms from translated synthesis.....                    | 10 |
| 5   | References .....                                                             | 12 |

# 1 Optimization of [<sup>18</sup>F]YH149 synthesis on droplet reactors

## 1.1 Initial conditions

**Table S1.** Results of initial experiments. **Condition 1** was adapted from the macroscale conditions reported by He et al. for the Cu-mediated radiosynthesis of [<sup>18</sup>F]YH149<sup>1</sup> by reducing reagent amounts by 10x (30x for Cu(OTf)<sub>2</sub>(Py)<sub>4</sub>) and volume by 30x. **Condition 2** was taken from a previous study where we optimized the Cu-mediated radiofluorination step for [<sup>18</sup>F]FDOPA, and we simply changed the precursor to that for [<sup>18</sup>F]YH149<sup>2</sup>. Abbreviations: PTC = phase transfer catalyst.

| Adapted reference condition                             | 1                                                                          | 2                                      |
|---------------------------------------------------------|----------------------------------------------------------------------------|----------------------------------------|
| PTC (amount (μmol))                                     | K <sub>222</sub> (1.7), K <sub>2</sub> C <sub>2</sub> O <sub>4</sub> (0.6) | TEAOTf (0.3)                           |
| Base (amount (μmol))                                    | K <sub>2</sub> CO <sub>3</sub> (0.07)                                      | Cs <sub>2</sub> CO <sub>3</sub> (0.01) |
| Amount of precursor (μmol) [mg]                         | 0.45 [0.24]                                                                | 0.45 [0.24]                            |
| Amount of Cu(OTf) <sub>2</sub> (Py) <sub>4</sub> (μmol) | 0.68                                                                       | 0.68                                   |
| 10 μL of solvent                                        | DMA/nBuOH (2:1, v/v)                                                       | DMA/Py (96:4, v/v)                     |
| Temperature (°C)                                        | 110                                                                        | 110                                    |
| Reaction time (min)                                     | 5                                                                          | 5                                      |
| <b>Radiosynthesis performance (n = 2)</b>               |                                                                            |                                        |
| Starting activity (MBq)                                 | 45 ± 1                                                                     | 46 ± 1                                 |
| Fluorination conversion (%)                             | 0                                                                          | 44 ± 1                                 |
| Collection efficiency (%), decay-corrected              | 84 ± 1                                                                     | 81 ± 2                                 |
| Crude RCY (%), decay-corrected                          | 0                                                                          | 36 ± 2                                 |

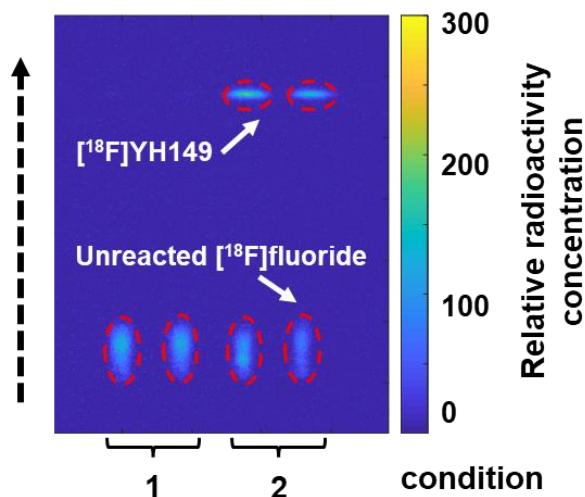

**Figure S1.** Analysis of crude fluorination products from initial experiments using multi-lane TLC with Cerenkov luminescence imaging (CLI) readout.

## 1.2 Influence of solvent type

**Table S2.** Impact of fluorination solvent on the performance of the droplet radiosynthesis of [<sup>18</sup>F]YH149.

| Solvent <sup>a</sup>              | Fluorination conversion (%) | Collection efficiency (%) | Crude RCY (%) |
|-----------------------------------|-----------------------------|---------------------------|---------------|
| DMF                               | 11 ± 2                      | 64 ± 4                    | 7 ± 1         |
| DMA                               | 43 ± 3                      | 69 ± 3                    | 29 ± 3        |
| DMSO                              | 3 ± 0                       | 70 ± 2                    | 2 ± 0         |
| NMP                               | 36 ± 1                      | 75 ± 6                    | 27 ± 2        |
| DMA/nBuOH (v/v, 2:1)              | 49 ± 2                      | 75 ± 1                    | 35 ± 0        |
| DMA/nBuOH (v/v, 2:1) <sup>b</sup> | 0                           | 84 ± 1                    | 0             |

<sup>a</sup>All reactions were performed with 0.3 μmol of TEAOTf, 0.01 μmol of Cs<sub>2</sub>CO<sub>3</sub>, 0.18 μmol of precursor and 0.68 μmol of Cu(OTf)<sub>2</sub>(Py)<sub>4</sub> in 10 μL of solvent/pyridine (96:4, v/v) at 110°C for 5 min (n = 3 replicates each condition). <sup>b</sup>The reaction was performed in the absence of pyridine (n = 2 replicates).

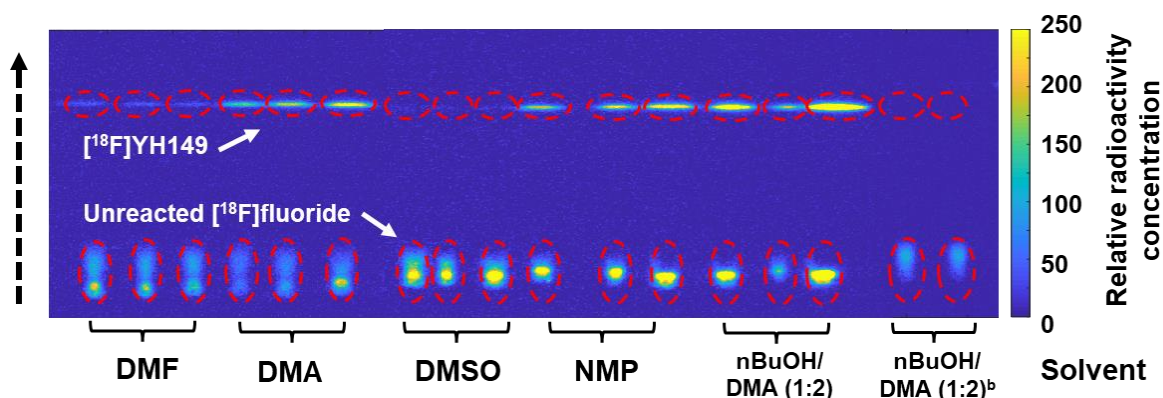

**Figure S2.** High-throughput analysis of crude fluorination products (from study of solvent) using multi-lane TLC with CLI readout.

## 1.3 Influence of type of phase transfer catalyst (PTC)/base

**Table S3.** Impact of type of PTC/base on the performance of the droplet radiosynthesis of [<sup>18</sup>F]YH149.

| PTC/base <sup>a</sup>                  | Fluorination conversion (%) | Collection efficiency (%) | Crude RCY (%) |
|----------------------------------------|-----------------------------|---------------------------|---------------|
| TEAOTf/Cs <sub>2</sub> CO <sub>3</sub> | 44 ± 3                      | 71 ± 3                    | 31 ± 3        |
| TBAOTf/Cs <sub>2</sub> CO <sub>3</sub> | 36 ± 2                      | 73 ± 8                    | 26 ± 4        |
| TEAOTf                                 | 36 ± 1                      | 70 ± 1                    | 25 ± 1        |
| TBAOTf                                 | 28 ± 7                      | 66 ± 6                    | 19 ± 6        |
| TBAHCO <sub>3</sub>                    | 18 ± 1                      | 77 ± 2                    | 14 ± 1        |

<sup>a</sup>All reaction was performed with 0.3 μmol of PTC, 0.01 μmol of Cs<sub>2</sub>CO<sub>3</sub> (if applied), 0.18 μmol of precursor and 0.68 μmol of Cu(OTf)<sub>2</sub>(Py)<sub>4</sub> in 10 μL of DMA/nBuOH/pyridine (64:32:4, v/v) at 110°C for 5 min (n = 3 replicates each condition).

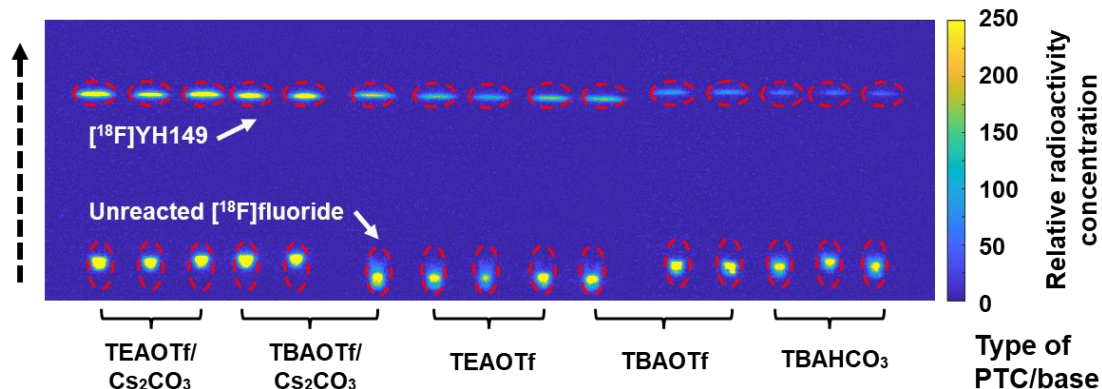

**Figure S3.** High-throughput analysis of crude fluorination products (from study of PTC/base type) using multi-lane TLC with CLI readout.

#### 1.4 Impact of fluorination temperature and base type

**Table S4.** Impact of fluorination temperature (when using TEAOTf/Cs<sub>2</sub>CO<sub>3</sub>) on the performance of the droplet radiosynthesis of [<sup>18</sup>F]YH149.

| Fluorination temperature (°C) <sup>a</sup> | Fluorination conversion (%) | Collection efficiency (%) | Crude RCY (%) |
|--------------------------------------------|-----------------------------|---------------------------|---------------|
| 100                                        | 29 ± 1                      | 70 ± 0                    | 21 ± 1        |
| 110                                        | 49 ± 1                      | 68 ± 1                    | 33 ± 1        |
| 115                                        | 58 ± 1                      | 65 ± 2                    | 38 ± 2        |
| 120                                        | 64 ± 4                      | 63 ± 2                    | 40 ± 2        |
| 130                                        | 70 ± 4                      | 59 ± 4                    | 41 ± 5        |
| 140                                        | 78 ± 1                      | 55 ± 1                    | 43 ± 1        |

<sup>a</sup>All reaction was performed with 0.3 μmol of PTC, 0.01 μmol of Cs<sub>2</sub>CO<sub>3</sub>, 0.18 μmol of precursor and 0.68 μmol of Cu(OTf)<sub>2</sub>(Py)<sub>4</sub> in 10 μL of DMA/nBuOH/pyridine (64:32:4, v/v) at investigating temperature for 5 min (n = 3 replicates each condition).

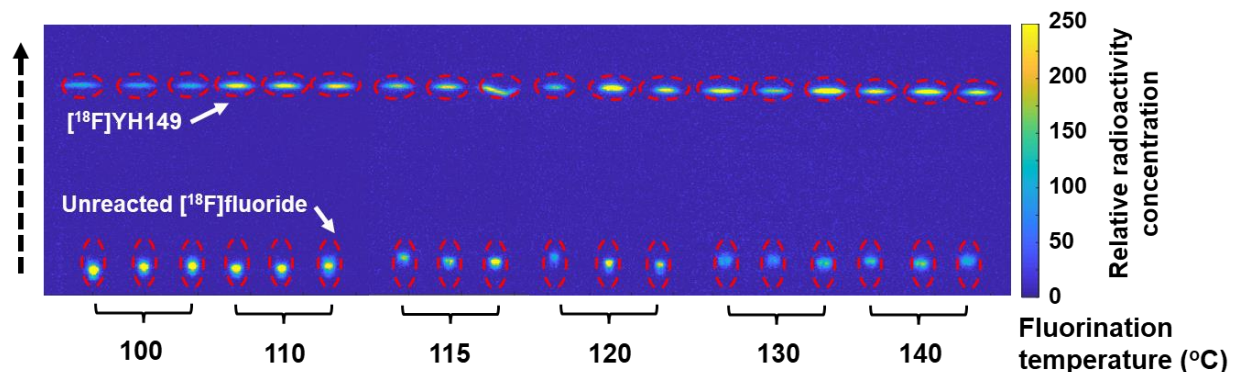

**Figure S4.** High-throughput analysis of crude fluorination products (from study of reaction temperature with TEAOTf/Cs<sub>2</sub>CO<sub>3</sub>) using multi-lane TLC with CLI readout.

**Table S5.** Impact of fluorination temperature (when using TEAOTf/K<sub>2</sub>CO<sub>3</sub>) on the performance of the droplet radiosynthesis of [<sup>18</sup>F]YH149.

| Fluorination temperature (°C) <sup>a</sup> | Fluorination conversion (%) | Collection efficiency (%) | Crude RCY (%) |
|--------------------------------------------|-----------------------------|---------------------------|---------------|
| 120                                        | 66 ± 3                      | 59 ± 2                    | 39 ± 3        |
| 140                                        | 67 ± 1                      | 57 ± 3                    | 38 ± 2        |
| 150                                        | 68 ± 1                      | 52 ± 2                    | 35 ± 1        |
| 160                                        | 58 ± 4                      | 46 ± 4                    | 26 ± 2        |

<sup>a</sup>All reaction was performed with 0.3 μmol of PTC, 0.01 μmol of K<sub>2</sub>CO<sub>3</sub>, 0.18 μmol of precursor and 0.68 μmol of Cu(OTf)<sub>2</sub>(Py)<sub>4</sub> in 10 μL of DMA/nBuOH/pyridine (64:32:4, v/v) at investigating temperature for 5 min (n = 3 replicates each condition).

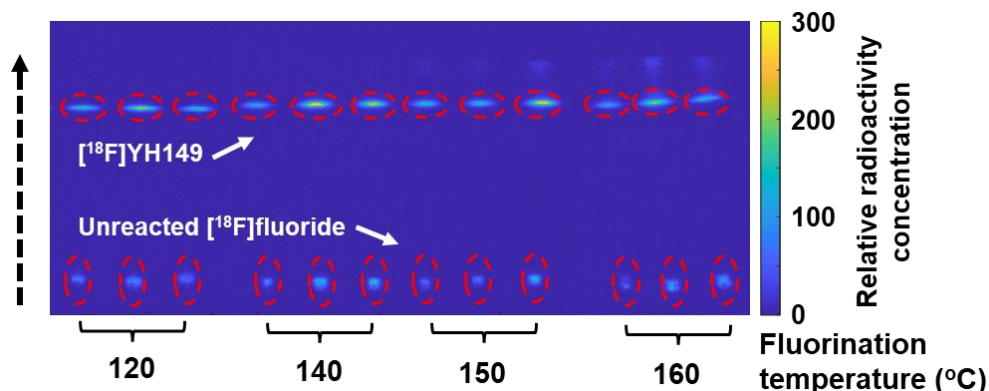

**Figure S5.** High-throughput analysis of crude fluorination products (from study of reaction temperature with TEAOTf/K<sub>2</sub>CO<sub>3</sub>) using multi-lane TLC with CLI readout.

### 1.5 Impact of reaction time

**Table S6.** Impact of reaction time on the performance of the droplet radiosynthesis of [<sup>18</sup>F]YH149.

| Reaction time (min) <sup>a</sup> | Fluorination conversion (%) | Collection efficiency (%) | Crude RCY (%) |
|----------------------------------|-----------------------------|---------------------------|---------------|
| 0.5                              | 35 ± 1                      | 74 ± 0                    | 26 ± 1        |
| 1                                | 41 ± 2                      | 63 ± 0                    | 26 ± 2        |
| 2                                | 61 ± 1                      | 63 ± 3                    | 39 ± 2        |
| 3                                | 66 ± 3                      | 64 ± 0                    | 42 ± 2        |
| 5                                | 68 ± 1                      | 52 ± 2                    | 36 ± 2        |
| 7                                | 73 ± 6                      | 49 ± 3                    | 36 ± 5        |

<sup>a</sup>All reaction was performed with 0.3 μmol of PTC, 0.01 μmol of K<sub>2</sub>CO<sub>3</sub>, 0.18 μmol of precursor and 0.68 μmol of Cu(OTf)<sub>2</sub>(Py)<sub>4</sub> in 10 μL of DMA/nBuOH/pyridine (64:32:4, v/v) at 140°C for investigating reaction time (n = 3 replicates each condition).

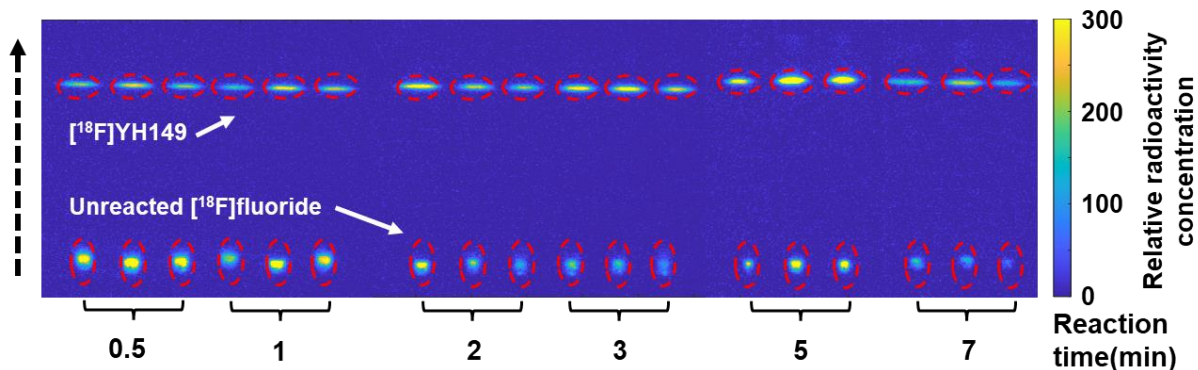

**Figure S6.** High-throughput analysis of crude fluorination products (from study of reaction time) using multi-lane TLC with CLI readout.

## 1.6 Influence of amount of base

**Table S7.** Impact of amount of base on the performance of the droplet radiosynthesis of  $[^{18}\text{F}]\text{YH149}$ .

| Base amount (nmol) <sup>a</sup> | Fluorination conversion (%) | Collection efficiency (%) | Crude RCY (%) |
|---------------------------------|-----------------------------|---------------------------|---------------|
| 10                              | 73 ± 6                      | 49 ± 3                    | 36 ± 5        |
| 20 <sup>b</sup>                 | 68 ± 7                      | 47 ± 1                    | 32 ± 4        |
| 30 <sup>b</sup>                 | 61 ± 2                      | 50 ± 2                    | 30 ± 2        |

<sup>a</sup>All reaction was performed with 0.3 μmol of PTC, investigating amount of  $\text{K}_2\text{CO}_3$ , 0.18 μmol of precursor and 0.68 μmol of  $\text{Cu}(\text{OTf})_2(\text{Py})_4$  in 10 μL of DMA/nBuOH/pyridine (64:32:4, v/v) at 140°C for 7 min (n = 3 replicates each condition). <sup>b</sup>n = 2 replicates each condition.

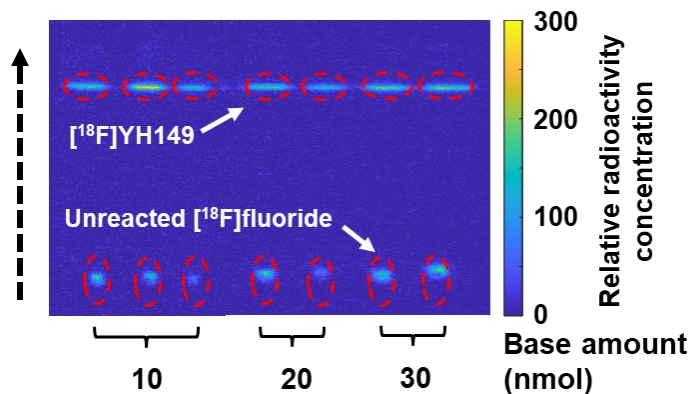

**Figure S7.** High-throughput analysis of crude fluorination products (from study of base amount with  $\text{K}_2\text{CO}_3$ ) using multi-lane TLC with CLI readout.

## 1.7 Influence of amount of precursor

**Table S8.** Influence of amount of precursor on the performance of the droplet radiosynthesis of [<sup>18</sup>F]YH149.

| Amount of precursor (mg) <sup>a</sup> | Fluorination conversion (%) | Collection efficiency (%) | Crude RCY (%) |
|---------------------------------------|-----------------------------|---------------------------|---------------|
| 0.05                                  | 66 ± 0                      | 53 ± 4                    | 35 ± 2        |
| 0.1                                   | 64 ± 5                      | 60 ± 6                    | 38 ± 1        |
| 0.15                                  | 62 ± 2                      | 68 ± 4                    | 42 ± 4        |
| 0.15 <sup>b</sup>                     | 80 ± 2                      | 71 ± 3                    | 56 ± 3        |
| 0.15 <sup>c</sup>                     | 71 ± 5                      | 57 ± 1                    | 40 ± 4        |
| 0.2                                   | 60 ± 1                      | 61 ± 2                    | 36 ± 1        |
| 0.25                                  | 59 ± 2                      | 61 ± 1                    | 36 ± 1        |
| 0.3                                   | 64 ± 3                      | 62 ± 2                    | 39 ± 3        |

<sup>a</sup>All reaction was performed with 0.3 μmol of PTC, 0.01 μmol of K<sub>2</sub>CO<sub>3</sub>, investigating amount of precursor and 0.68 μmol of Cu(OTf)<sub>2</sub>(Py)<sub>4</sub> in 10 μL of DMA/nBuOH (v/v, 2:1) along with 4% of pyridine (v/v) at 140°C for 3 min (n=3 replicates each condition). <sup>b</sup>The reaction was performed with Cs<sub>2</sub>CO<sub>3</sub> instead of K<sub>2</sub>CO<sub>3</sub>, and was repeated n = 4 times. <sup>c</sup>The reaction was performed in presence of DMA/nBuOH/pyridine (64:32:4, v/v), and was repeated n = 4 times.

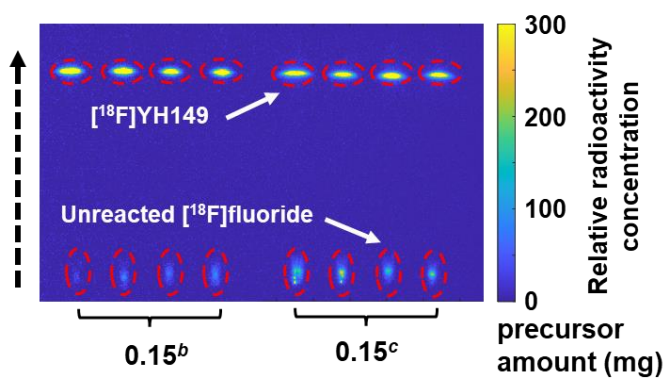

**Figure S8.** High-throughput analysis of crude fluorination products (from additional tested conditions) using multi-lane TLC with CLI readout. The conditions marked at the bottom are precursor amounts with superscripts matching the special cases from **Table S8**.

## 2 Macroscale synthesis performance

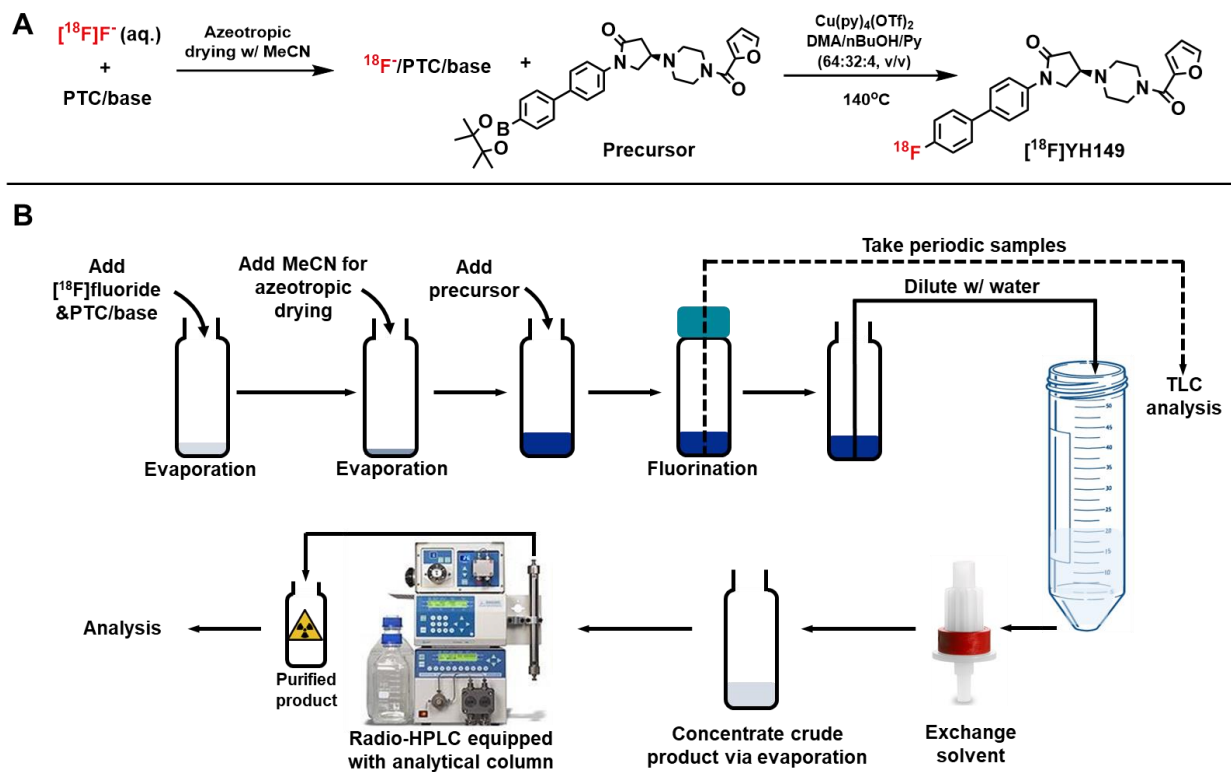

**Figure S9.** Implementation of radiosynthesis in a vial-based (macroscale) reaction.

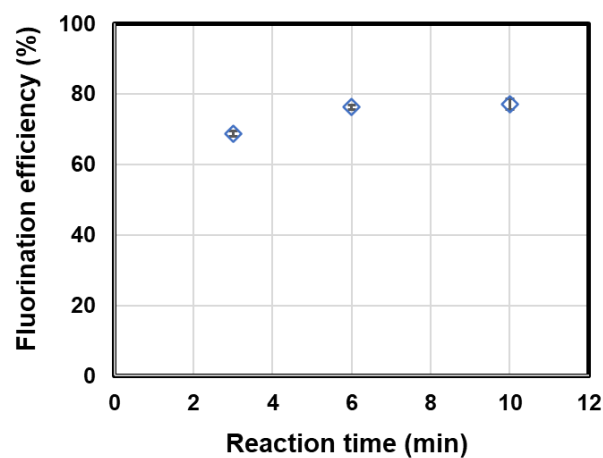

**Figure S10.** Impact on fluorination efficiency of different reaction times ( $n = 4$ ) in the macroscale synthesis.



**Table S9.** Performance of translated (droplet to vial) radiosynthesis of [<sup>18</sup>F]YH149. Activity measurements are expressed as fractions of starting activity (corrected for decay).

| <b>Process</b>                                                | <b>Measurement</b>                                                                      | <b>Result</b> |
|---------------------------------------------------------------|-----------------------------------------------------------------------------------------|---------------|
| <b>[<sup>18</sup>F]F<sup>-</sup> drying</b>                   | Starting activity (GBq)                                                                 | 0.2-1.4       |
|                                                               | Duration for evaporating initial 25 μL [ <sup>18</sup> F]F <sup>-</sup> /PTC/base (min) | 5             |
|                                                               | Duration for cooling down (min)                                                         | 1             |
|                                                               | 3 X Duration for additional MeCN (30 μL) azeotropic evaporation (min)                   | 6             |
|                                                               | 3 X Duration for cooling down (min)                                                     | 3             |
|                                                               | Duration of the whole drying process (min)                                              | 15            |
| <b>Radio-fluorination</b>                                     | Activity of 3-min sample (%)                                                            | 0.3 ± 0.2     |
|                                                               | Activity of 6-min sample (%)                                                            | 0.4 ± 0.2     |
|                                                               | Activity of 10-min sample (%)                                                           | 0.3 ± 0.2     |
|                                                               | Collected activity from reactor (%)                                                     | 81 ± 5        |
|                                                               | Residual activity in reactors after extraction (%)                                      | 17 ± 4        |
|                                                               | Duration (min)                                                                          | 15            |
| <b>Exchange solvent to MeCN and concentrate to &lt;0.1 mL</b> | Activity before loading on cartridge (%)                                                | 81 ± 5        |
|                                                               | Activity trapped on light C18 (%)                                                       | 52 ± 10       |
|                                                               | Waste from trapping and washing process (%)                                             | 27 ± 11       |
|                                                               | Eluted activity with 0.5 mL of MeCN (%)                                                 | 51 ± 10       |
|                                                               | Residue activity on cartridge (%)                                                       | 1 ± 0         |
|                                                               | Duration of the solvent-exchange process (min)                                          | 10            |
|                                                               | Duration of MeCN evaporation                                                            | 5             |
| <b>Purification</b>                                           | Isolated [ <sup>18</sup> F]YH149 from radio-HPLC (%)                                    | 50 ± 10       |
|                                                               | Duration (min)                                                                          | 13            |
|                                                               | Total preparation time (min)                                                            | 58            |

### 3 Calibration curve to determine molar activity

The same analytical scale radio-HPLC system was used to determine the molar activity of the purified [ $^{18}\text{F}$ ]YH149. The area under the curve for the UV absorbance peak was determined for a range of mole amounts of YH149 reference standard (0.06-0.98 nmol) to generate a linear calibration curve (**Figure S11**). This curve was then used to determine the mass of YH149 in the unknown sample, and subsequently compute the molar activity, following standard procedures.

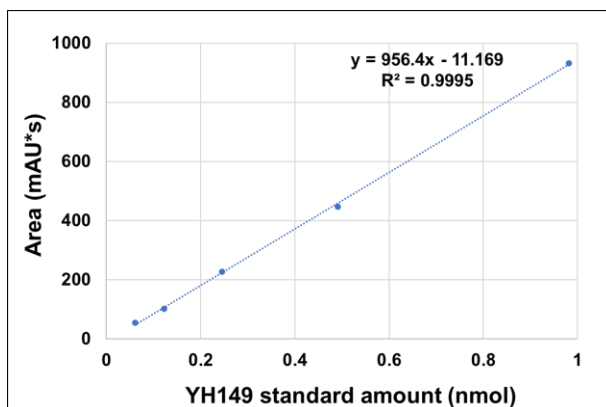

**Figure S11.** Calibration curve of YH149 reference standard (254 nm wavelength).

### 4 Example HPLC chromatograms from translated synthesis

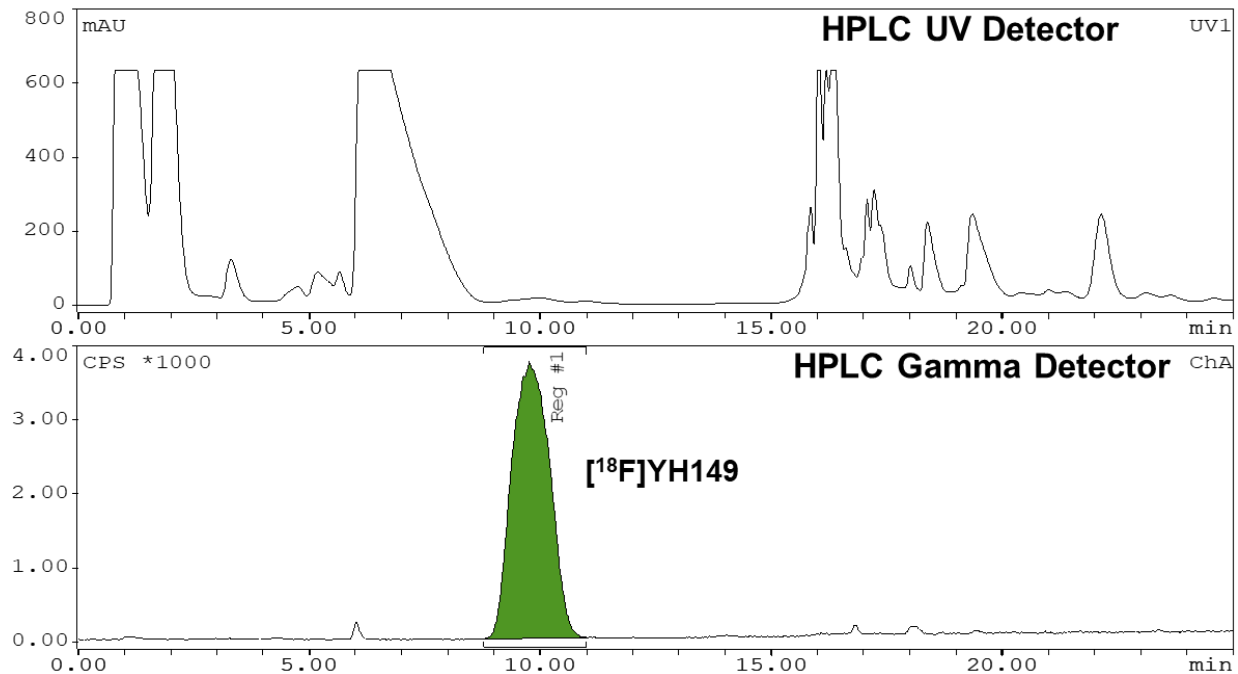

**Figure S12.** Example radio-HPLC chromatogram of crude [ $^{18}\text{F}$ ]YH149 from macroscale radiosynthesis. The retention time was 10.0 min, earlier than that with microscale purification ( $t_R=18.6$  min) because the crude sample was injected in 100  $\mu\text{L}$  MeCN (versus 80  $\mu\text{L}$  of the HPLC mobile phase for the microscale synthesis).

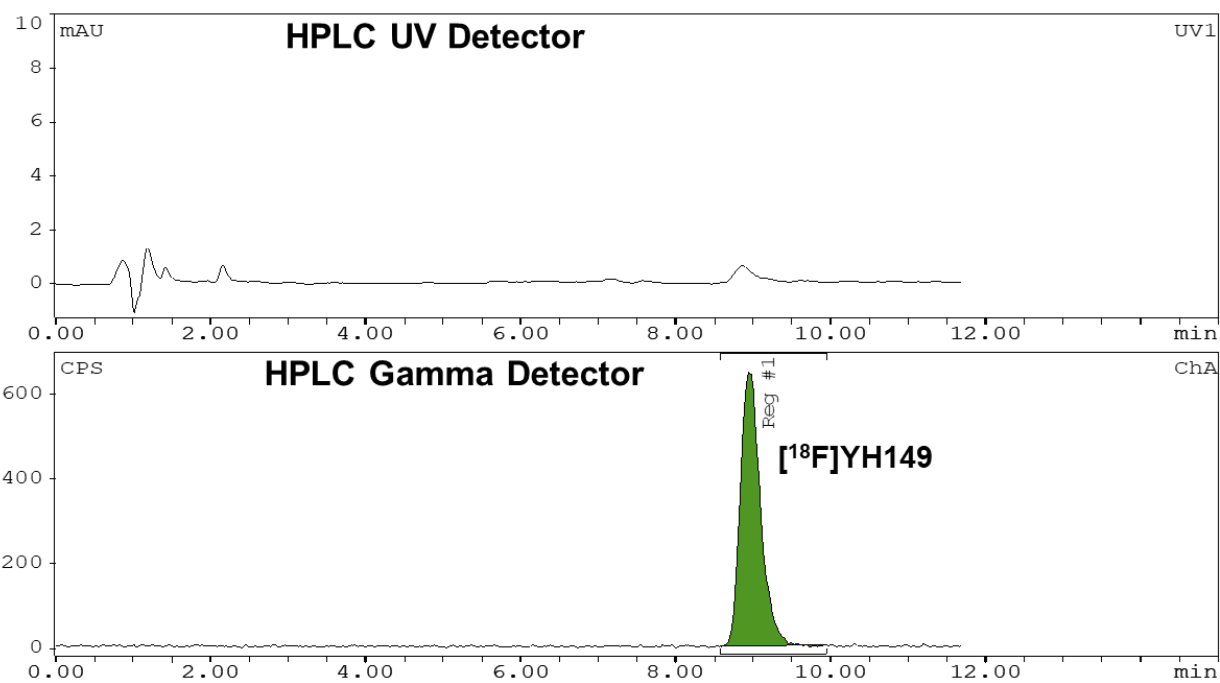

**Figure S13.** Example radio-HPLC chromatogram of purified [<sup>18</sup>F]YH149 from macroscale radiosynthesis.

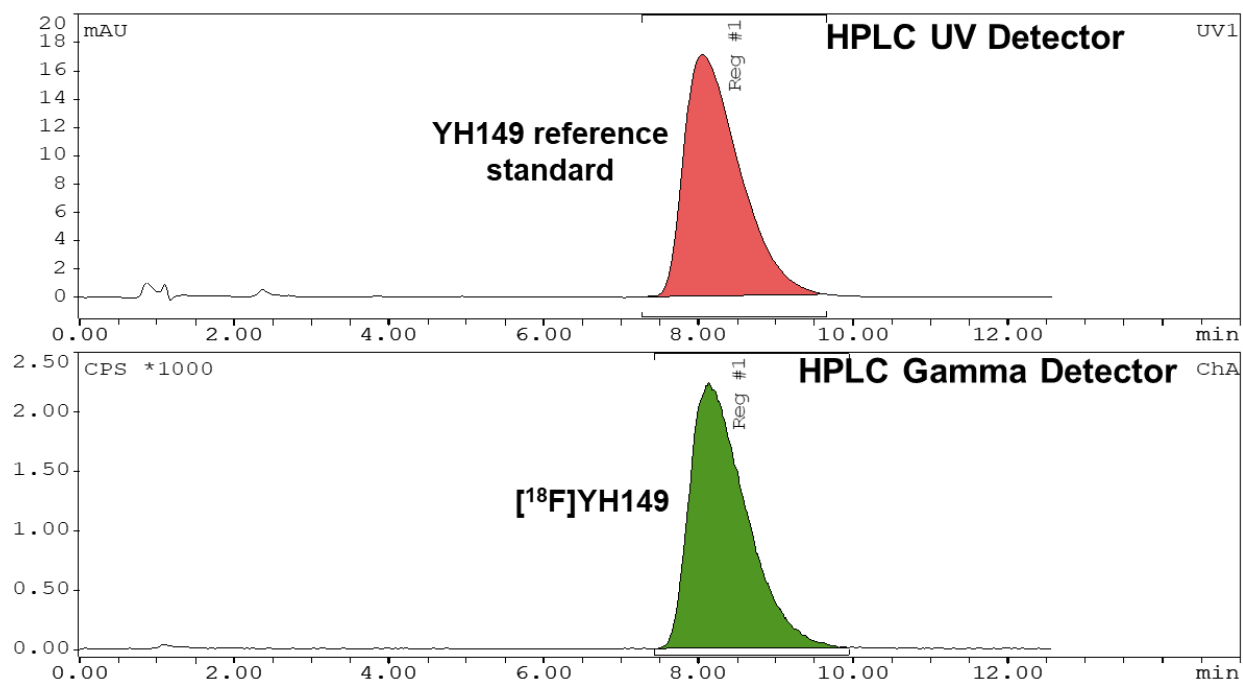

**Figure S14.** Example radio-HPLC chromatogram of co-injection of purified [<sup>18</sup>F]YH149 (from macroscale radiosynthesis) and reference standard.

## 5 References

- 1 Y. He, M. Schild, U. Grether, J. Benz, L. Leibrock, D. Heer, A. Topp, L. Collin, B. Kuhn, M. Wittwer, C. Keller, L. C. Gobbi, R. Schibli and L. Mu, *J. Med. Chem.*, 2022, **65**, 2191–2207.
- 2 Y. Lu and R. M. van Dam, *Nuclear Medicine and Biology*, 2021, **96–97**, S15–S16.
